# Supplementary material for: Lactobacillus reuteri V3401 Reduces Inflammatory Biomarkers and Modifies the Gastrointestinal Microbiome in Adults with Metabolic Syndrome: The PROSIR Study
Source: Nutrients. 2019 Jul 31;11(8):1761. doi: 10.3390/nu11081761 (PMC6723328; doi:10.3390/nu11081761)
Supplement: Supplementary file 1 [file nutrients-11-01761-s001.zip › supplementary table-547567.xlsx]

## Sheet: Phylum
Table S1. Gastrointestinal microbiome normalized data.
	3977256-091-1	3977258-089-1	3977259-088-1	3977260-087-1	3977261-086-1	3977262-085-1	3977264-083-1	3977265-082-1	3977267-080-1	3977268-079-1	3977269-078-1	3977270-077-1	3977271-076-1	3977272-075-1	3977273-074-1	3977274-073-1	3977275-075-1	3978593-074-2	3978596-081-2	3978598-077-2	3978599-071-2	3978602-073-2	3978603-086-2	3978607-084-2	3978633-088-2	3978641-072-2	3978824-078-2	3979808-089-2	3979852-079-2	3996048-090-2	3997605-074-3	3997716-077-3	3997718-071-3	3997727-085-3	3997758-079-3	3997759-080-3	3997761-082-3	3997773-084-3	3997971-072-3	3997973-091-3	3997979-081-3	4001465-083-3	4001664-087-3	4001665-078-3	4001667-073-3	4001771-089-3	4032170-087-6	4032171-086-6	4032175-072-6
k__Archaea;p__Euryarchaeota	0	0	0	0	0	0	0	0	0	2	0	0	0	1	0	0	0	0	0	0	0	0	0	0	0	5	0	0	0	0	0	0	0	0	0	0	0	0	43	0	0	0	0	0	0	0	0	0	0
k__Bacteria;p__Actinobacteria	26	46	18	86	10	8	107	194	8	141	13	19	59	78	7	45	112	3	57	18	64	5	0	15	42	66	12	82	12	55	1	31	91	7	150	19	8	91	178	15	99	47	62	13	5	33	43	14	45
k__Bacteria;p__Bacteroidetes	1770	1265	1393	1621	1697	1148	1332	786	1450	1375	775	720	1639	1476	1794	1917	1689	1435	1475	966	1606	1751	1369	1276	1186	928	1232	1024	1542	1321	1415	272	1706	1380	1192	1699	914	1718	824	1185	1016	1091	1077	1010	1763	171	1386	1265	958
k__Bacteria;p__Cyanobacteria	0	0	0	0	0	80	0	0	0	0	16	1	1	0	0	0	0	0	0	0	0	16	0	184	0	3	14	0	0	0	0	0	0	26	0	0	0	0	4	0	0	0	0	4	6	0	0	0	1
k__Bacteria;p__Elusimicrobia	0	0	0	0	0	0	0	0	0	0	131	0	0	0	0	0	0	0	0	0	0	0	0	0	0	0	158	0	0	0	0	0	0	0	0	0	0	0	0	0	0	0	0	6	0	0	0	0	0
k__Bacteria;p__Firmicutes	1136	1519	1418	1321	1287	1297	1566	2105	1623	1486	1148	2244	1358	1493	1070	1139	1232	1584	1497	1257	953	1060	1654	1519	1766	1653	1301	1677	1518	1650	1607	2261	1132	1480	1779	1350	2122	1178	1538	1771	1794	1597	1419	1532	1280	2928	1560	1827	1226
k__Bacteria;p__Fusobacteria	0	16	0	0	0	0	0	0	0	0	0	66	0	0	0	0	0	0	0	716	0	0	0	0	0	0	0	4	0	0	0	164	0	0	0	0	0	0	0	0	0	0	1	0	0	0	0	0	0
k__Bacteria;p__Lentisphaerae	1	0	6	0	0	19	0	0	0	2	16	0	0	0	0	1	0	0	3	0	0	0	0	0	3	10	18	0	1	0	0	0	0	0	2	0	0	0	4	0	0	0	0	6	2	0	0	0	8
k__Bacteria;p__Proteobacteria	247	329	345	152	168	615	9	93	94	166	1073	125	106	129	307	72	145	152	110	149	557	303	148	186	172	62	423	390	107	92	88	451	251	243	57	112	135	120	109	209	6	38	27	508	120	48	44	74	110
k__Bacteria;p__Synergistetes	0	0	0	0	0	0	0	2	0	0	0	0	0	0	0	0	0	0	0	0	0	0	0	0	0	17	0	0	0	0	0	0	0	0	0	0	1	0	16	0	0	0	0	0	0	0	0	0	5
k__Bacteria;p__TM7	0	5	0	0	0	0	0	0	0	0	0	0	0	0	0	0	2	0	0	0	0	0	0	0	0	0	0	0	0	0	1	0	0	0	0	0	0	0	0	0	3	0	0	0	0	0	0	0	0
k__Bacteria;p__Tenericutes	0	0	0	0	0	3	10	0	2	7	7	0	8	3	0	6	0	0	0	0	0	0	0	0	0	38	2	0	0	11	0	0	0	0	0	0	0	0	14	0	2	0	3	4	0	0	2	0	18
k__Bacteria;p__Verrucomicrobia	0	0	0	0	18	10	156	0	3	1	1	5	9	0	2	0	0	6	38	74	0	45	9	0	11	398	20	3	0	51	68	1	0	44	0	0	0	73	450	0	260	407	591	97	4	0	145	0	809
[truncated: 155 more columns]

## Sheet: Class
	3977256-091-1	3977258-089-1	3977259-088-1	3977260-087-1	3977261-086-1	3977262-085-1	3977264-083-1	3977265-082-1	3977267-080-1	3977268-079-1	3977269-078-1	3977270-077-1	3977271-076-1	3977272-075-1	3977273-074-1	3977274-073-1	3977275-075-1	3978593-074-2	3978596-081-2	3978598-077-2	3978599-071-2	3978602-073-2	3978603-086-2	3978607-084-2	3978633-088-2	3978641-072-2	3978824-078-2	3979808-089-2	3979852-079-2	3996048-090-2	3997605-074-3	3997716-077-3	3997718-071-3	3997727-085-3	3997758-079-3	3997759-080-3	3997761-082-3	3997773-084-3	3997971-072-3	3997973-091-3	3997979-081-3	4001465-083-3	4001664-087-3	4001665-078-3	4001667-073-3	4001771-089-3	4032170-087-6	4032171-086-6	4032175-072-6
k__Archaea;p__Euryarchaeota;c__Methanobacteria	0	0	0	0	0	0	0	0	0	0	0	0	0	1	0	0	0	0	0	0	0	0	0	0	0	4	0	0	0	0	0	0	0	0	0	0	0	0	43	0	0	0	0	0	0	0	0	0	0
k__Archaea;p__Euryarchaeota;c__Thermoplasmata	0	0	0	0	0	0	0	0	0	2	0	0	0	0	0	0	0	0	0	0	0	0	0	0	0	1	0	0	0	0	0	0	0	0	0	0	0	0	0	0	0	0	0	0	0	0	0	0	0
k__Bacteria;p__Actinobacteria;c__Actinobacteria	3	11	4	14	10	5	24	104	0	84	0	9	6	36	4	21	92	0	29	0	46	1	0	10	27	10	0	6	7	33	0	3	57	0	59	5	6	79	81	0	50	6	42	0	0	0	17	2	28
k__Bacteria;p__Actinobacteria;c__Coriobacteriia	23	35	14	72	0	3	83	90	8	57	13	10	53	42	3	24	20	3	28	18	18	4	0	5	15	56	12	76	5	22	1	28	34	7	91	14	2	12	97	15	49	41	20	13	5	33	26	12	17
k__Bacteria;p__Bacteroidetes;c__Bacteroidia	1770	1265	1393	1621	1697	1148	1332	786	1450	1375	775	720	1639	1476	1794	1917	1689	1435	1475	966	1606	1751	1369	1276	1186	928	1232	1024	1542	1321	1415	272	1706	1380	1192	1699	914	1718	824	1185	1016	1091	1077	1010	1763	171	1386	1265	958
k__Bacteria;p__Cyanobacteria;c__4C0d-2	0	0	0	0	0	80	0	0	0	0	16	1	1	0	0	0	0	0	0	0	0	16	0	184	0	3	14	0	0	0	0	0	0	26	0	0	0	0	4	0	0	0	0	4	6	0	0	0	1
k__Bacteria;p__Elusimicrobia;c__Elusimicrobia	0	0	0	0	0	0	0	0	0	0	131	0	0	0	0	0	0	0	0	0	0	0	0	0	0	0	158	0	0	0	0	0	0	0	0	0	0	0	0	0	0	0	0	6	0	0	0	0	0
k__Bacteria;p__Firmicutes;c__Bacilli	0	0	60	6	9	9	0	3	3	81	10	2	18	19	39	0	5	70	3	0	2	1	0	2	7	4	0	29	6	14	0	3	11	0	23	16	0	0	9	16	0	0	9	0	3	5	4	0	1
k__Bacteria;p__Firmicutes;c__Clostridia	1053	1492	1294	1304	1272	1185	1490	2008	1596	1333	1073	2083	1296	1459	1031	1077	1155	1514	1490	1211	888	1044	1651	1490	1683	1598	1223	1620	1441	1605	1600	2244	1100	1323	1661	1308	2121	1166	1488	1693	1785	1561	1392	1468	1262	2906	1550	1792	1199
k__Bacteria;p__Firmicutes;c__Erysipelotrichi	83	27	64	11	6	103	76	94	24	72	65	159	44	15	0	62	72	0	4	46	63	15	3	27	76	51	78	28	71	31	7	14	21	157	95	26	1	12	41	62	9	36	18	64	15	17	6	35	26
k__Bacteria;p__Fusobacteria;c__Fusobacteriia	0	16	0	0	0	0	0	0	0	0	0	66	0	0	0	0	0	0	0	716	0	0	0	0	0	0	0	4	0	0	0	164	0	0	0	0	0	0	0	0	0	0	1	0	0	0	0	0	0
k__Bacteria;p__Lentisphaerae;c__[Lentisphaeria]	1	0	6	0	0	19	0	0	0	2	16	0	0	0	0	1	0	0	3	0	0	0	0	0	3	10	18	0	1	0	0	0	0	0	2	0	0	0	4	0	0	0	0	6	2	0	0	0	8
k__Bacteria;p__Proteobacteria;c__Alphaproteobacteria	2	16	0	0	8	467	0	0	0	7	286	1	21	15	0	1	0	0	0	5	349	31	13	20	54	21	65	3	0	0	0	0	11	107	0	0	1	0	1	0	0	10	0	107	1	0	0	0	53
k__Bacteria;p__Proteobacteria;c__Betaproteobacteria	194	263	291	80	62	131	9	68	21	121	51	86	70	54	216	40	120	120	82	58	152	150	44	151	113	15	83	297	86	71	74	0	142	95	39	79	94	68	20	140	5	12	16	42	50	44	41	62	11
k__Bacteria;p__Proteobacteria;c__Deltaproteobacteria	10	50	54	18	78	16	0	25	68	20	31	31	12	18	34	31	25	23	26	86	44	118	34	15	5	12	49	38	9	21	12	23	57	41	18	22	30	24	29	64	1	8	11	94	69	0	3	12	46
k__Bacteria;p__Proteobacteria;c__Epsilonproteobacteria	0	0	0	0	0	0	0	0	0	0	0	0	0	0	0	0	0	0	0	0	0	0	0	0	0	0	0	0	0	0	0	0	0	0	0	0	0	0	0	0	0	0	0	0	0	0	0	0	0
k__Bacteria;p__Proteobacteria;c__Gammaproteobacteria	41	0	0	54	20	1	0	0	5	18	705	7	3	42	57	0	0	9	2	0	12	4	57	0	0	14	226	52	12	0	2	428	41	0	0	11	10	28	59	5	0	8	0	265	0	4	0	0	0
k__Bacteria;p__Synergistetes;c__Synergistia	0	0	0	0	0	0	0	2	0	0	0	0	0	0	0	0	0	0	0	0	0	0	0	0	0	17	0	0	0	0	0	0	0	0	0	0	1	0	16	0	0	0	0	0	0	0	0	0	5
k__Bacteria;p__TM7;c__TM7-3	0	5	0	0	0	0	0	0	0	0	0	0	0	0	0	0	2	0	0	0	0	0	0	0	0	0	0	0	0	0	1	0	0	0	0	0	0	0	0	0	3	0	0	0	0	0	0	0	0
k__Bacteria;p__Tenericutes;c__Mollicutes	0	0	0	0	0	0	0	0	2	0	0	0	8	0	0	0	0	0	0	0	0	0	0	0	0	2	0	0	0	11	0	0	0	0	0	0	0	0	2	0	2	0	0	2	0	0	0	0	3
k__Bacteria;p__Tenericutes;c__RF3	0	0	0	0	0	3	10	0	0	7	7	0	0	3	0	6	0	0	0	0	0	0	0	0	0	36	2	0	0	0	0	0	0	0	0	0	0	0	12	0	0	0	3	2	0	0	2	0	15
k__Bacteria;p__Verrucomicrobia;c__Opitutae	0	0	0	0	0	0	6	0	0	0	1	0	0	0	0	0	0	0	0	0	0	0	0	0	0	3	20	0	0	0	0	0	0	0	0	0	0	0	9	0	0	12	0	7	0	0	0	0	3
k__Bacteria;p__Verrucomicrobia;c__Verrucomicrobiae	0	0	0	0	18	10	150	0	3	1	0	5	9	0	2	0	0	6	38	74	0	45	9	0	11	395	0	3	0	51	68	1	0	44	0	0	0	73	441	0	260	395	591	90	4	0	145	0	806
[truncated: 155 more columns]

## Sheet: Orden
	3977256-091-1	3977258-089-1	3977259-088-1	3977260-087-1	3977261-086-1	3977262-085-1	3977264-083-1	3977265-082-1	3977267-080-1	3977268-079-1	3977269-078-1	3977270-077-1	3977271-076-1	3977272-075-1	3977273-074-1	3977274-073-1	3977275-075-1	3978593-074-2	3978596-081-2	3978598-077-2	3978599-071-2	3978602-073-2	3978603-086-2	3978607-084-2	3978633-088-2	3978641-072-2	3978824-078-2	3979808-089-2	3979852-079-2	3996048-090-2	3997605-074-3	3997716-077-3	3997718-071-3	3997727-085-3	3997758-079-3	3997759-080-3	3997761-082-3	3997773-084-3	3997971-072-3	3997973-091-3	3997979-081-3	4001465-083-3	4001664-087-3	4001665-078-3	4001667-073-3	4001771-089-3	4032170-087-6	4032171-086-6	4032175-072-6
k__Archaea;p__Euryarchaeota;c__Methanobacteria;o__Methanobacteriales	0	0	0	0	0	0	0	0	0	0	0	0	0	1	0	0	0	0	0	0	0	0	0	0	0	4	0	0	0	0	0	0	0	0	0	0	0	0	43	0	0	0	0	0	0	0	0	0	0
k__Archaea;p__Euryarchaeota;c__Thermoplasmata;o__E2	0	0	0	0	0	0	0	0	0	2	0	0	0	0	0	0	0	0	0	0	0	0	0	0	0	1	0	0	0	0	0	0	0	0	0	0	0	0	0	0	0	0	0	0	0	0	0	0	0
k__Bacteria;p__Actinobacteria;c__Actinobacteria;o__Actinomycetales	0	0	4	0	0	0	0	0	0	0	0	0	0	1	4	0	0	0	0	0	0	1	0	0	0	0	0	0	0	0	0	0	0	0	0	0	0	0	2	0	0	0	0	0	0	0	0	0	0
k__Bacteria;p__Actinobacteria;c__Actinobacteria;o__Bifidobacteriales	3	11	0	14	10	5	24	104	0	84	0	9	6	35	0	21	92	0	29	0	46	0	0	10	27	10	0	6	7	33	0	3	57	0	59	5	6	79	79	0	50	6	42	0	0	0	17	2	28
k__Bacteria;p__Actinobacteria;c__Coriobacteriia;o__Coriobacteriales	23	35	14	72	0	3	83	90	8	57	13	10	53	42	3	24	20	3	28	18	18	4	0	5	15	56	12	76	5	22	1	28	34	7	91	14	2	12	97	15	49	41	20	13	5	33	26	12	17
k__Bacteria;p__Bacteroidetes;c__Bacteroidia;o__Bacteroidales	1770	1265	1393	1621	1697	1148	1332	786	1450	1375	775	720	1639	1476	1794	1917	1689	1435	1475	966	1606	1751	1369	1276	1186	928	1232	1024	1542	1321	1415	272	1706	1380	1192	1699	914	1718	824	1185	1016	1091	1077	1010	1763	171	1386	1265	958
k__Bacteria;p__Cyanobacteria;c__4C0d-2;o__YS2	0	0	0	0	0	80	0	0	0	0	16	1	1	0	0	0	0	0	0	0	0	16	0	184	0	3	14	0	0	0	0	0	0	26	0	0	0	0	4	0	0	0	0	4	6	0	0	0	1
k__Bacteria;p__Elusimicrobia;c__Elusimicrobia;o__Elusimicrobiales	0	0	0	0	0	0	0	0	0	0	131	0	0	0	0	0	0	0	0	0	0	0	0	0	0	0	158	0	0	0	0	0	0	0	0	0	0	0	0	0	0	0	0	6	0	0	0	0	0
k__Bacteria;p__Firmicutes;c__Bacilli;o__Gemellales	0	0	0	0	0	0	0	0	0	0	0	0	0	0	0	0	0	0	0	0	0	0	0	0	0	0	0	0	0	0	0	0	0	0	0	0	0	0	0	0	0	0	0	0	0	0	0	0	0
k__Bacteria;p__Firmicutes;c__Bacilli;o__Lactobacillales	0	0	60	6	9	9	0	3	0	80	4	2	3	14	39	0	5	70	3	0	2	1	0	1	7	4	0	29	6	14	0	3	11	0	23	0	0	0	9	16	0	0	9	0	0	5	4	0	1
k__Bacteria;p__Firmicutes;c__Bacilli;o__Turicibacterales	0	0	0	0	0	0	0	0	3	1	6	0	15	5	0	0	0	0	0	0	0	0	0	1	0	0	0	0	0	0	0	0	0	0	0	16	0	0	0	0	0	0	0	0	3	0	0	0	0
k__Bacteria;p__Firmicutes;c__Clostridia;o__Clostridiales	1053	1492	1294	1304	1272	1185	1489	2008	1596	1333	1072	2083	1296	1459	1031	1077	1155	1514	1490	1211	888	1044	1651	1490	1683	1596	1221	1620	1441	1605	1600	2244	1100	1321	1661	1308	2121	1166	1481	1693	1783	1561	1392	1462	1262	2906	1550	1792	1199
k__Bacteria;p__Firmicutes;c__Clostridia;o__SHA-98	0	0	0	0	0	0	1	0	0	0	1	0	0	0	0	0	0	0	0	0	0	0	0	0	0	2	2	0	0	0	0	0	0	2	0	0	0	0	7	0	2	0	0	6	0	0	0	0	0
k__Bacteria;p__Firmicutes;c__Erysipelotrichi;o__Erysipelotrichales	83	27	64	11	6	103	76	94	24	72	65	159	44	15	0	62	72	0	4	46	63	15	3	27	76	51	78	28	71	31	7	14	21	157	95	26	1	12	41	62	9	36	18	64	15	17	6	35	26
k__Bacteria;p__Fusobacteria;c__Fusobacteriia;o__Fusobacteriales	0	16	0	0	0	0	0	0	0	0	0	66	0	0	0	0	0	0	0	716	0	0	0	0	0	0	0	4	0	0	0	164	0	0	0	0	0	0	0	0	0	0	1	0	0	0	0	0	0
k__Bacteria;p__Lentisphaerae;c__[Lentisphaeria];o__Victivallales	1	0	6	0	0	19	0	0	0	2	16	0	0	0	0	1	0	0	3	0	0	0	0	0	3	10	18	0	1	0	0	0	0	0	2	0	0	0	4	0	0	0	0	6	2	0	0	0	8
k__Bacteria;p__Proteobacteria;c__Alphaproteobacteria;__	0	0	0	0	0	0	0	0	0	0	55	0	0	0	0	0	0	0	0	0	0	0	0	0	0	0	1	0	0	0	0	0	0	0	0	0	0	0	0	0	0	0	0	6	0	0	0	0	0
k__Bacteria;p__Proteobacteria;c__Alphaproteobacteria;o__RF32	2	16	0	0	8	467	0	0	0	7	231	1	21	15	0	1	0	0	0	5	349	31	13	20	54	21	64	3	0	0	0	0	11	107	0	0	1	0	1	0	0	10	0	101	1	0	0	0	53
k__Bacteria;p__Proteobacteria;c__Betaproteobacteria;o__Burkholderiales	194	263	291	80	62	131	9	68	21	121	51	86	70	54	216	40	120	120	82	58	152	150	44	151	113	15	83	297	86	71	74	0	142	95	39	79	94	68	20	140	5	12	16	42	50	44	41	62	11
k__Bacteria;p__Proteobacteria;c__Deltaproteobacteria;o__Desulfovibrionales	10	50	54	18	78	16	0	25	68	20	31	31	12	18	34	31	25	23	26	86	44	118	34	15	5	12	49	38	9	21	12	23	57	41	18	22	30	24	29	64	1	8	11	94	69	0	3	12	46
k__Bacteria;p__Proteobacteria;c__Epsilonproteobacteria;o__Campylobacterales	0	0	0	0	0	0	0	0	0	0	0	0	0	0	0	0	0	0	0	0	0	0	0	0	0	0	0	0	0	0	0	0	0	0	0	0	0	0	0	0	0	0	0	0	0	0	0	0	0
k__Bacteria;p__Proteobacteria;c__Gammaproteobacteria;o__Aeromonadales	0	0	0	0	0	0	0	0	0	0	705	0	0	5	0	0	0	0	0	0	0	0	0	0	0	0	223	0	0	0	0	0	0	0	0	0	0	0	0	0	0	0	0	260	0	0	0	0	0
k__Bacteria;p__Proteobacteria;c__Gammaproteobacteria;o__Enterobacteriales	41	0	0	54	7	1	0	0	2	7	0	7	0	0	0	0	0	0	2	0	12	4	57	0	0	14	3	52	0	0	2	428	41	0	0	1	10	28	59	5	0	8	0	5	0	4	0	0	0
k__Bacteria;p__Proteobacteria;c__Gammaproteobacteria;o__Pasteurellales	0	0	0	0	13	0	0	0	3	11	0	0	3	37	54	0	0	9	0	0	0	0	0	0	0	0	0	0	12	0	0	0	0	0	0	10	0	0	0	0	0	0	0	0	0	0	0	0	0
k__Bacteria;p__Proteobacteria;c__Gammaproteobacteria;o__Pseudomonadales	0	0	0	0	0	0	0	0	0	0	0	0	0	0	3	0	0	0	0	0	0	0	0	0	0	0	0	0	0	0	0	0	0	0	0	0	0	0	0	0	0	0	0	0	0	0	0	0	0
k__Bacteria;p__Synergistetes;c__Synergistia;o__Synergistales	0	0	0	0	0	0	0	2	0	0	0	0	0	0	0	0	0	0	0	0	0	0	0	0	0	17	0	0	0	0	0	0	0	0	0	0	1	0	16	0	0	0	0	0	0	0	0	0	5
k__Bacteria;p__TM7;c__TM7-3;o__	0	5	0	0	0	0	0	0	0	0	0	0	0	0	0	0	2	0	0	0	0	0	0	0	0	0	0	0	0	0	1	0	0	0	0	0	0	0	0	0	3	0	0	0	0	0	0	0	0
k__Bacteria;p__Tenericutes;c__Mollicutes;o__Anaeroplasmatales	0	0	0	0	0	0	0	0	2	0	0	0	0	0	0	0	0	0	0	0	0	0	0	0	0	0	0	0	0	0	0	0	0	0	0	0	0	0	0	0	0	0	0	0	0	0	0	0	0
k__Bacteria;p__Tenericutes;c__Mollicutes;o__RF39	0	0	0	0	0	0	0	0	0	0	0	0	8	0	0	0	0	0	0	0	0	0	0	0	0	2	0	0	0	11	0	0	0	0	0	0	0	0	2	0	2	0	0	2	0	0	0	0	3
k__Bacteria;p__Tenericutes;c__RF3;o__ML615J-28	0	0	0	0	0	3	10	0	0	7	7	0	0	3	0	6	0	0	0	0	0	0	0	0	0	36	2	0	0	0	0	0	0	0	0	0	0	0	12	0	0	0	3	2	0	0	2	0	15
k__Bacteria;p__Verrucomicrobia;c__Opitutae;o__[Cerasicoccales]	0	0	0	0	0	0	6	0	0	0	1	0	0	0	0	0	0	0	0	0	0	0	0	0	0	3	20	0	0	0	0	0	0	0	0	0	0	0	9	0	0	12	0	7	0	0	0	0	3
k__Bacteria;p__Verrucomicrobia;c__Verrucomicrobiae;o__Verrucomicrobiales	0	0	0	0	18	10	150	0	3	1	0	5	9	0	2	0	0	6	38	74	0	45	9	0	11	395	0	3	0	51	68	1	0	44	0	0	0	73	441	0	260	395	591	90	4	0	145	0	806
[truncated: 155 more columns]

## Sheet: Family
	3977256-091-1	3977258-089-1	3977259-088-1	3977260-087-1	3977261-086-1	3977262-085-1	3977264-083-1	3977265-082-1	3977267-080-1	3977268-079-1	3977269-078-1	3977270-077-1	3977271-076-1	3977272-075-1	3977273-074-1	3977274-073-1	3977275-075-1	3978593-074-2	3978596-081-2	3978598-077-2	3978599-071-2	3978602-073-2	3978603-086-2	3978607-084-2	3978633-088-2	3978641-072-2	3978824-078-2	3979808-089-2	3979852-079-2	3996048-090-2	3997605-074-3	3997716-077-3	3997718-071-3	3997727-085-3	3997758-079-3	3997759-080-3	3997761-082-3	3997773-084-3	3997971-072-3	3997973-091-3	3997979-081-3	4001465-083-3	4001664-087-3	4001665-078-3	4001667-073-3	4001771-089-3	4032170-087-6	4032171-086-6	4032175-072-6
k__Archaea;p__Euryarchaeota;c__Methanobacteria;o__Methanobacteriales;f__Methanobacteriaceae	0	0	0	0	0	0	0	0	0	0	0	0	0	1	0	0	0	0	0	0	0	0	0	0	0	4	0	0	0	0	0	0	0	0	0	0	0	0	43	0	0	0	0	0	0	0	0	0	0
k__Archaea;p__Euryarchaeota;c__Thermoplasmata;o__E2;f__[Methanomassiliicoccaceae]	0	0	0	0	0	0	0	0	0	2	0	0	0	0	0	0	0	0	0	0	0	0	0	0	0	1	0	0	0	0	0	0	0	0	0	0	0	0	0	0	0	0	0	0	0	0	0	0	0
k__Bacteria;p__Actinobacteria;c__Actinobacteria;o__Actinomycetales;f__Actinomycetaceae	0	0	1	0	0	0	0	0	0	0	0	0	0	1	0	0	0	0	0	0	0	1	0	0	0	0	0	0	0	0	0	0	0	0	0	0	0	0	2	0	0	0	0	0	0	0	0	0	0
k__Bacteria;p__Actinobacteria;c__Actinobacteria;o__Actinomycetales;f__Micrococcaceae	0	0	3	0	0	0	0	0	0	0	0	0	0	0	4	0	0	0	0	0	0	0	0	0	0	0	0	0	0	0	0	0	0	0	0	0	0	0	0	0	0	0	0	0	0	0	0	0	0
k__Bacteria;p__Actinobacteria;c__Actinobacteria;o__Bifidobacteriales;f__Bifidobacteriaceae	3	11	0	14	10	5	24	104	0	84	0	9	6	35	0	21	92	0	29	0	46	0	0	10	27	10	0	6	7	33	0	3	57	0	59	5	6	79	79	0	50	6	42	0	0	0	17	2	28
k__Bacteria;p__Actinobacteria;c__Coriobacteriia;o__Coriobacteriales;f__Coriobacteriaceae	23	35	14	72	0	3	83	90	8	57	13	10	53	42	3	24	20	3	28	18	18	4	0	5	15	56	12	76	5	22	1	28	34	7	91	14	2	12	97	15	49	41	20	13	5	33	26	12	17
k__Bacteria;p__Bacteroidetes;c__Bacteroidia;o__Bacteroidales;__	0	0	0	0	0	0	0	0	0	0	10	0	21	0	0	0	0	0	0	0	0	0	0	0	0	0	17	0	0	0	0	0	0	0	0	0	0	0	0	0	0	0	0	4	0	0	0	0	0
k__Bacteria;p__Bacteroidetes;c__Bacteroidia;o__Bacteroidales;f__	78	0	0	0	0	0	0	0	0	4	76	0	0	0	0	0	0	0	0	0	0	0	0	0	0	20	45	0	16	0	0	0	0	0	23	0	0	0	28	9	0	0	0	20	0	0	0	0	15
k__Bacteria;p__Bacteroidetes;c__Bacteroidia;o__Bacteroidales;f__Bacteroidaceae	159	776	1070	1324	617	819	708	206	348	362	156	681	333	742	1262	371	1440	908	150	633	1128	384	588	755	1013	586	396	688	277	960	943	247	1163	981	471	137	235	1187	483	354	188	594	756	571	433	112	1104	643	649
k__Bacteria;p__Bacteroidetes;c__Bacteroidia;o__Bacteroidales;f__Porphyromonadaceae	169	168	39	148	32	64	56	59	136	68	66	25	14	161	113	41	121	99	59	97	175	144	55	251	50	20	144	115	21	101	87	5	227	52	76	25	87	273	45	81	43	62	103	170	69	3	83	47	34
k__Bacteria;p__Bacteroidetes;c__Bacteroidia;o__Bacteroidales;f__Prevotellaceae	1078	0	0	0	426	0	252	32	343	595	359	0	988	0	0	1156	0	0	896	133	15	786	366	0	1	36	426	0	1132	0	0	0	6	0	325	1431	361	0	16	507	461	239	0	111	929	0	0	326	57
k__Bacteria;p__Bacteroidetes;c__Bacteroidia;o__Bacteroidales;f__Rikenellaceae	6	170	213	48	143	72	144	257	188	168	11	5	90	103	161	151	19	129	61	42	78	192	73	147	69	185	37	126	40	125	152	18	86	140	122	29	98	97	162	8	89	89	154	36	148	37	124	70	157
k__Bacteria;p__Bacteroidetes;c__Bacteroidia;o__Bacteroidales;f__S24-7	122	0	0	0	236	123	3	0	236	89	32	2	64	225	0	0	0	0	110	0	0	0	118	0	0	0	55	0	16	0	0	0	0	94	77	41	0	0	0	119	174	1	0	9	0	0	0	79	3
k__Bacteria;p__Bacteroidetes;c__Bacteroidia;o__Bacteroidales;f__[Barnesiellaceae]	0	74	0	54	52	38	67	153	5	9	11	0	30	8	118	93	31	135	2	24	101	101	12	21	36	39	7	76	2	46	151	0	60	49	5	10	51	34	18	0	3	46	34	14	62	12	43	19	12
k__Bacteria;p__Bacteroidetes;c__Bacteroidia;o__Bacteroidales;f__[Odoribacteraceae]	25	77	71	47	30	32	69	35	10	53	46	7	30	35	82	60	35	73	68	24	76	66	18	25	17	20	49	19	12	17	44	2	35	64	29	2	21	9	48	0	18	29	30	29	39	7	32	17	17
k__Bacteria;p__Bacteroidetes;c__Bacteroidia;o__Bacteroidales;f__[Paraprevotellaceae]	133	0	0	0	161	0	33	44	184	27	8	0	69	202	58	45	43	91	129	13	33	78	139	77	0	22	56	0	26	72	38	0	129	0	64	24	61	118	24	107	40	31	0	46	83	0	0	64	14
k__Bacteria;p__Cyanobacteria;c__4C0d-2;o__YS2;f__	0	0	0	0	0	80	0	0	0	0	16	1	1	0	0	0	0	0	0	0	0	16	0	184	0	3	14	0	0	0	0	0	0	26	0	0	0	0	4	0	0	0	0	4	6	0	0	0	1
k__Bacteria;p__Elusimicrobia;c__Elusimicrobia;o__Elusimicrobiales;f__Elusimicrobiaceae	0	0	0	0	0	0	0	0	0	0	131	0	0	0	0	0	0	0	0	0	0	0	0	0	0	0	158	0	0	0	0	0	0	0	0	0	0	0	0	0	0	0	0	6	0	0	0	0	0
k__Bacteria;p__Firmicutes;c__Bacilli;o__Gemellales;f__Gemellaceae	0	0	0	0	0	0	0	0	0	0	0	0	0	0	0	0	0	0	0	0	0	0	0	0	0	0	0	0	0	0	0	0	0	0	0	0	0	0	0	0	0	0	0	0	0	0	0	0	0
k__Bacteria;p__Firmicutes;c__Bacilli;o__Lactobacillales;f__Carnobacteriaceae	0	0	4	0	0	0	0	0	0	0	0	0	0	0	0	0	0	0	0	0	0	0	0	0	0	0	0	0	0	0	0	0	0	0	0	0	0	0	0	0	0	0	0	0	0	0	0	0	0
k__Bacteria;p__Firmicutes;c__Bacilli;o__Lactobacillales;f__Enterococcaceae	0	0	0	0	9	0	0	0	0	0	0	0	0	0	0	0	0	0	0	0	0	0	0	0	0	0	0	0	0	0	0	0	0	0	0	0	0	0	0	0	0	0	0	0	0	0	0	0	0
k__Bacteria;p__Firmicutes;c__Bacilli;o__Lactobacillales;f__Lactobacillaceae	0	0	1	0	0	0	0	0	0	68	0	0	0	0	0	0	0	0	0	0	0	0	0	0	0	0	0	0	2	0	0	0	2	0	6	0	0	0	0	0	0	0	0	0	0	0	0	0	0
k__Bacteria;p__Firmicutes;c__Bacilli;o__Lactobacillales;f__Streptococcaceae	0	0	55	6	0	9	0	3	0	12	4	2	3	14	39	0	5	70	3	0	2	1	0	1	7	4	0	29	4	14	0	3	9	0	17	0	0	0	9	16	0	0	9	0	0	5	4	0	1
k__Bacteria;p__Firmicutes;c__Bacilli;o__Turicibacterales;f__Turicibacteraceae	0	0	0	0	0	0	0	0	3	1	6	0	15	5	0	0	0	0	0	0	0	0	0	1	0	0	0	0	0	0	0	0	0	0	0	16	0	0	0	0	0	0	0	0	3	0	0	0	0
k__Bacteria;p__Firmicutes;c__Clostridia;o__Clostridiales;__	11	0	22	0	13	7	10	2	4	8	24	0	30	14	2	2	0	0	5	0	0	0	5	4	18	241	157	0	3	0	7	0	0	8	0	0	1	0	100	8	8	4	2	72	2	0	3	3	68
k__Bacteria;p__Firmicutes;c__Clostridia;o__Clostridiales;f__	62	0	10	39	57	47	9	12	28	105	93	0	85	20	12	52	37	42	56	20	86	15	99	50	47	220	60	1	32	22	17	3	28	129	65	11	0	56	376	20	109	57	41	75	49	4	15	72	192
k__Bacteria;p__Firmicutes;c__Clostridia;o__Clostridiales;f__Christensenellaceae	20	0	0	0	1	0	18	0	1	12	21	0	7	1	0	3	0	0	14	0	0	0	0	0	2	169	21	0	13	1	5	0	0	0	24	0	0	2	204	0	70	34	10	7	0	0	20	0	91
k__Bacteria;p__Firmicutes;c__Clostridia;o__Clostridiales;f__Clostridiaceae	6	1	18	0	36	3	2	2	16	1	17	20	34	14	6	30	0	11	3	8	16	4	15	5	70	8	2	0	0	8	13	5	7	13	0	85	3	1	18	0	3	2	1	15	30	35	18	12	50
k__Bacteria;p__Firmicutes;c__Clostridia;o__Clostridiales;f__Dehalobacteriaceae	0	0	0	0	0	0	0	0	0	0	0	0	0	0	0	0	0	0	0	0	0	0	0	0	0	0	0	0	0	0	0	0	0	0	0	0	0	0	5	0	0	3	0	0	0	0	0	0	0
k__Bacteria;p__Firmicutes;c__Clostridia;o__Clostridiales;f__Lachnospiraceae	472	865	417	760	386	683	545	427	453	403	308	1267	479	677	428	379	658	609	444	512	192	492	874	761	830	320	320	517	700	711	719	946	404	577	318	336	312	391	353	536	424	455	297	322	594	1116	463	808	154
k__Bacteria;p__Firmicutes;c__Clostridia;o__Clostridiales;f__Peptococcaceae	0	0	0	0	0	0	3	0	2	0	0	0	0	5	0	0	0	0	0	3	0	7	0	2	5	5	2	0	0	0	0	0	0	0	0	0	0	1	4	0	5	5	0	11	1	0	0	0	2
k__Bacteria;p__Firmicutes;c__Clostridia;o__Clostridiales;f__Peptostreptococcaceae	5	0	72	0	10	0	0	4	26	11	16	12	40	23	1	0	4	5	2	15	0	0	2	3	14	0	17	0	0	0	1	20	1	0	0	36	0	0	0	3	0	0	0	5	7	0	0	7	0
k__Bacteria;p__Firmicutes;c__Clostridia;o__Clostridiales;f__Ruminococcaceae	303	399	593	455	586	355	769	787	567	567	529	431	530	628	391	475	316	598	359	230	351	322	489	479	618	609	507	136	543	806	639	170	526	447	986	490	589	470	412	301	573	832	774	701	394	1105	882	727	621
k__Bacteria;p__Firmicutes;c__Clostridia;o__Clostridiales;f__Veillonellaceae	166	223	157	45	179	87	125	772	499	217	64	353	85	74	191	136	140	245	604	423	234	204	163	186	76	23	130	963	149	55	193	1100	122	138	263	350	1216	245	9	818	577	168	264	251	185	638	149	162	16
k__Bacteria;p__Firmicutes;c__Clostridia;o__Clostridiales;f__[Mogibacteriaceae]	8	4	5	5	4	3	8	2	0	9	0	0	6	3	0	0	0	4	3	0	7	0	4	0	3	1	5	3	1	2	6	0	7	9	5	0	0	0	0	7	13	1	3	3	0	8	0	1	2
k__Bacteria;p__Firmicutes;c__Clostridia;o__Clostridiales;f__[Tissierellaceae]	0	0	0	0	0	0	0	0	0	0	0	0	0	0	0	0	0	0	0	0	2	0	0	0	0	0	0	0	0	0	0	0	5	0	0	0	0	0	0	0	1	0	0	0	0	0	0	0	3
k__Bacteria;p__Firmicutes;c__Clostridia;o__SHA-98;f__	0	0	0	0	0	0	1	0	0	0	1	0	0	0	0	0	0	0	0	0	0	0	0	0	0	2	2	0	0	0	0	0	0	2	0	0	0	0	7	0	2	0	0	6	0	0	0	0	0
k__Bacteria;p__Firmicutes;c__Erysipelotrichi;o__Erysipelotrichales;f__Erysipelotrichaceae	83	27	64	11	6	103	76	94	24	72	65	159	44	15	0	62	72	0	4	46	63	15	3	27	76	51	78	28	71	31	7	14	21	157	95	26	1	12	41	62	9	36	18	64	15	17	6	35	26
k__Bacteria;p__Fusobacteria;c__Fusobacteriia;o__Fusobacteriales;f__Fusobacteriaceae	0	16	0	0	0	0	0	0	0	0	0	66	0	0	0	0	0	0	0	716	0	0	0	0	0	0	0	4	0	0	0	164	0	0	0	0	0	0	0	0	0	0	1	0	0	0	0	0	0
k__Bacteria;p__Lentisphaerae;c__[Lentisphaeria];o__Victivallales;f__Victivallaceae	1	0	6	0	0	19	0	0	0	2	16	0	0	0	0	1	0	0	3	0	0	0	0	0	3	10	18	0	1	0	0	0	0	0	2	0	0	0	4	0	0	0	0	6	2	0	0	0	8
k__Bacteria;p__Proteobacteria;c__Alphaproteobacteria;__;__	0	0	0	0	0	0	0	0	0	0	55	0	0	0	0	0	0	0	0	0	0	0	0	0	0	0	1	0	0	0	0	0	0	0	0	0	0	0	0	0	0	0	0	6	0	0	0	0	0
k__Bacteria;p__Proteobacteria;c__Alphaproteobacteria;o__RF32;f__	2	16	0	0	8	467	0	0	0	7	231	1	21	15	0	1	0	0	0	5	349	31	13	20	54	21	64	3	0	0	0	0	11	107	0	0	1	0	1	0	0	10	0	101	1	0	0	0	53
k__Bacteria;p__Proteobacteria;c__Betaproteobacteria;o__Burkholderiales;f__Alcaligenaceae	194	263	291	80	61	131	9	68	21	119	51	86	70	54	216	40	120	120	82	58	152	150	42	151	113	15	83	297	84	71	74	0	142	95	39	79	93	68	20	140	5	12	16	42	50	44	41	62	11
k__Bacteria;p__Proteobacteria;c__Betaproteobacteria;o__Burkholderiales;f__Oxalobacteraceae	0	0	0	0	1	0	0	0	0	2	0	0	0	0	0	0	0	0	0	0	0	0	2	0	0	0	0	0	2	0	0	0	0	0	0	0	1	0	0	0	0	0	0	0	0	0	0	0	0
k__Bacteria;p__Proteobacteria;c__Deltaproteobacteria;o__Desulfovibrionales;f__Desulfovibrionaceae	10	50	54	18	78	16	0	25	68	20	31	31	12	18	34	31	25	23	26	86	44	118	34	15	5	12	49	38	9	21	12	23	57	41	18	22	30	24	29	64	1	8	11	94	69	0	3	12	46
k__Bacteria;p__Proteobacteria;c__Epsilonproteobacteria;o__Campylobacterales;f__Campylobacteraceae	0	0	0	0	0	0	0	0	0	0	0	0	0	0	0	0	0	0	0	0	0	0	0	0	0	0	0	0	0	0	0	0	0	0	0	0	0	0	0	0	0	0	0	0	0	0	0	0	0
k__Bacteria;p__Proteobacteria;c__Gammaproteobacteria;o__Aeromonadales;f__Aeromonadaceae	0	0	0	0	0	0	0	0	0	0	0	0	0	0	0	0	0	0	0	0	0	0	0	0	0	0	0	0	0	0	0	0	0	0	0	0	0	0	0	0	0	0	0	0	0	0	0	0	0
k__Bacteria;p__Proteobacteria;c__Gammaproteobacteria;o__Aeromonadales;f__Succinivibrionaceae	0	0	0	0	0	0	0	0	0	0	705	0	0	5	0	0	0	0	0	0	0	0	0	0	0	0	223	0	0	0	0	0	0	0	0	0	0	0	0	0	0	0	0	260	0	0	0	0	0
k__Bacteria;p__Proteobacteria;c__Gammaproteobacteria;o__Enterobacteriales;f__Enterobacteriaceae	41	0	0	54	7	1	0	0	2	7	0	7	0	0	0	0	0	0	2	0	12	4	57	0	0	14	3	52	0	0	2	428	41	0	0	1	10	28	59	5	0	8	0	5	0	4	0	0	0
k__Bacteria;p__Proteobacteria;c__Gammaproteobacteria;o__Pasteurellales;f__Pasteurellaceae	0	0	0	0	13	0	0	0	3	11	0	0	3	37	54	0	0	9	0	0	0	0	0	0	0	0	0	0	12	0	0	0	0	0	0	10	0	0	0	0	0	0	0	0	0	0	0	0	0
k__Bacteria;p__Proteobacteria;c__Gammaproteobacteria;o__Pseudomonadales;f__Pseudomonadaceae	0	0	0	0	0	0	0	0	0	0	0	0	0	0	3	0	0	0	0	0	0	0	0	0	0	0	0	0	0	0	0	0	0	0	0	0	0	0	0	0	0	0	0	0	0	0	0	0	0
k__Bacteria;p__Synergistetes;c__Synergistia;o__Synergistales;f__Dethiosulfovibrionaceae	0	0	0	0	0	0	0	2	0	0	0	0	0	0	0	0	0	0	0	0	0	0	0	0	0	0	0	0	0	0	0	0	0	0	0	0	1	0	0	0	0	0	0	0	0	0	0	0	0
k__Bacteria;p__Synergistetes;c__Synergistia;o__Synergistales;f__Synergistaceae	0	0	0	0	0	0	0	0	0	0	0	0	0	0	0	0	0	0	0	0	0	0	0	0	0	17	0	0	0	0	0	0	0	0	0	0	0	0	16	0	0	0	0	0	0	0	0	0	5
k__Bacteria;p__TM7;c__TM7-3;o__;f__	0	5	0	0	0	0	0	0	0	0	0	0	0	0	0	0	2	0	0	0	0	0	0	0	0	0	0	0	0	0	1	0	0	0	0	0	0	0	0	0	3	0	0	0	0	0	0	0	0
k__Bacteria;p__Tenericutes;c__Mollicutes;o__Anaeroplasmatales;f__Anaeroplasmataceae	0	0	0	0	0	0	0	0	2	0	0	0	0	0	0	0	0	0	0	0	0	0	0	0	0	0	0	0	0	0	0	0	0	0	0	0	0	0	0	0	0	0	0	0	0	0	0	0	0
k__Bacteria;p__Tenericutes;c__Mollicutes;o__RF39;f__	0	0	0	0	0	0	0	0	0	0	0	0	8	0	0	0	0	0	0	0	0	0	0	0	0	2	0	0	0	11	0	0	0	0	0	0	0	0	2	0	2	0	0	2	0	0	0	0	3
k__Bacteria;p__Tenericutes;c__RF3;o__ML615J-28;f__	0	0	0	0	0	3	10	0	0	7	7	0	0	3	0	6	0	0	0	0	0	0	0	0	0	36	2	0	0	0	0	0	0	0	0	0	0	0	12	0	0	0	3	2	0	0	2	0	15
k__Bacteria;p__Verrucomicrobia;c__Opitutae;o__[Cerasicoccales];f__[Cerasicoccaceae]	0	0	0	0	0	0	6	0	0	0	1	0	0	0	0	0	0	0	0	0	0	0	0	0	0	3	20	0	0	0	0	0	0	0	0	0	0	0	9	0	0	12	0	7	0	0	0	0	3
k__Bacteria;p__Verrucomicrobia;c__Verrucomicrobiae;o__Verrucomicrobiales;f__Verrucomicrobiaceae	0	0	0	0	18	10	150	0	3	1	0	5	9	0	2	0	0	6	38	74	0	45	9	0	11	395	0	3	0	51	68	1	0	44	0	0	0	73	441	0	260	395	591	90	4	0	145	0	806
[truncated: 155 more columns]

## Sheet: genus
	3977256-091-1	3977258-089-1	3977259-088-1	3977260-087-1	3977261-086-1	3977262-085-1	3977264-083-1	3977265-082-1	3977267-080-1	3977268-079-1	3977269-078-1	3977270-077-1	3977271-076-1	3977272-075-1	3977273-074-1	3977274-073-1	3977275-075-1	3978593-074-2	3978596-081-2	3978598-077-2	3978599-071-2	3978602-073-2	3978603-086-2	3978607-084-2	3978633-088-2	3978641-072-2	3978824-078-2	3979808-089-2	3979852-079-2	3996048-090-2	3997605-074-3	3997716-077-3	3997718-071-3	3997727-085-3	3997758-079-3	3997759-080-3	3997761-082-3	3997773-084-3	3997971-072-3	3997973-091-3	3997979-081-3	4001465-083-3	4001664-087-3	4001665-078-3	4001667-073-3	4001771-089-3	4032170-087-6	4032171-086-6	4032175-072-6
k__Archaea;p__Euryarchaeota;c__Methanobacteria;o__Methanobacteriales;f__Methanobacteriaceae;g__Methanobrevibacter	0	0	0	0	0	0	0	0	0	0	0	0	0	1	0	0	0	0	0	0	0	0	0	0	0	4	0	0	0	0	0	0	0	0	0	0	0	0	43	0	0	0	0	0	0	0	0	0	0
k__Archaea;p__Euryarchaeota;c__Thermoplasmata;o__E2;f__[Methanomassiliicoccaceae];g__vadinCA11	0	0	0	0	0	0	0	0	0	2	0	0	0	0	0	0	0	0	0	0	0	0	0	0	0	1	0	0	0	0	0	0	0	0	0	0	0	0	0	0	0	0	0	0	0	0	0	0	0
k__Bacteria;p__Actinobacteria;c__Actinobacteria;o__Actinomycetales;f__Actinomycetaceae;g__Actinomyces	0	0	1	0	0	0	0	0	0	0	0	0	0	1	0	0	0	0	0	0	0	1	0	0	0	0	0	0	0	0	0	0	0	0	0	0	0	0	2	0	0	0	0	0	0	0	0	0	0
k__Bacteria;p__Actinobacteria;c__Actinobacteria;o__Actinomycetales;f__Micrococcaceae;g__Rothia	0	0	3	0	0	0	0	0	0	0	0	0	0	0	4	0	0	0	0	0	0	0	0	0	0	0	0	0	0	0	0	0	0	0	0	0	0	0	0	0	0	0	0	0	0	0	0	0	0
k__Bacteria;p__Actinobacteria;c__Actinobacteria;o__Bifidobacteriales;f__Bifidobacteriaceae;g__Bifidobacterium	3	11	0	14	10	5	24	104	0	84	0	9	6	35	0	21	92	0	29	0	46	0	0	10	27	10	0	6	7	33	0	3	57	0	59	5	6	79	79	0	50	6	42	0	0	0	17	2	28
k__Bacteria;p__Actinobacteria;c__Coriobacteriia;o__Coriobacteriales;f__Coriobacteriaceae;__	0	0	0	0	0	1	0	0	0	0	0	0	0	0	0	0	0	0	0	0	0	0	0	0	0	0	0	0	0	0	0	0	0	0	0	0	0	0	0	0	0	2	0	0	0	0	0	0	0
k__Bacteria;p__Actinobacteria;c__Coriobacteriia;o__Coriobacteriales;f__Coriobacteriaceae;g__	0	0	11	7	0	1	0	2	5	6	2	0	4	8	0	6	0	0	0	0	0	2	0	0	5	15	2	0	0	2	0	0	0	3	34	3	0	0	32	3	20	2	1	6	4	0	8	3	6
k__Bacteria;p__Actinobacteria;c__Coriobacteriia;o__Coriobacteriales;f__Coriobacteriaceae;g__Adlercreutzia	0	0	3	3	0	1	0	1	0	2	0	0	0	0	0	0	3	0	3	0	0	0	0	0	0	6	0	0	0	0	0	0	7	4	3	0	0	0	10	0	0	10	3	0	0	0	0	0	2
k__Bacteria;p__Actinobacteria;c__Coriobacteriia;o__Coriobacteriales;f__Coriobacteriaceae;g__Atopobium	0	0	0	0	0	0	0	0	0	0	0	0	0	0	0	0	0	0	0	0	0	0	0	0	0	0	0	0	0	0	1	0	0	0	0	0	0	0	0	0	0	0	0	0	0	0	0	0	0
k__Bacteria;p__Actinobacteria;c__Coriobacteriia;o__Coriobacteriales;f__Coriobacteriaceae;g__Collinsella	23	15	0	58	0	0	83	85	3	45	10	0	47	28	0	14	14	0	10	16	15	2	0	5	10	21	6	74	5	20	0	27	22	0	31	11	2	12	29	11	15	27	6	7	1	30	10	9	5
k__Bacteria;p__Actinobacteria;c__Coriobacteriia;o__Coriobacteriales;f__Coriobacteriaceae;g__Eggerthella	0	20	0	0	0	0	0	0	0	0	0	10	0	0	3	0	0	3	0	2	0	0	0	0	0	0	0	2	0	0	0	1	0	0	0	0	0	0	0	0	0	0	0	0	0	3	0	0	0
k__Bacteria;p__Actinobacteria;c__Coriobacteriia;o__Coriobacteriales;f__Coriobacteriaceae;g__Slackia	0	0	0	4	0	0	0	2	0	4	1	0	2	6	0	4	3	0	15	0	3	0	0	0	0	14	4	0	0	0	0	0	5	0	23	0	0	0	26	1	14	0	10	0	0	0	8	0	4
k__Bacteria;p__Bacteroidetes;c__Bacteroidia;o__Bacteroidales;__;__	0	0	0	0	0	0	0	0	0	0	10	0	21	0	0	0	0	0	0	0	0	0	0	0	0	0	17	0	0	0	0	0	0	0	0	0	0	0	0	0	0	0	0	4	0	0	0	0	0
k__Bacteria;p__Bacteroidetes;c__Bacteroidia;o__Bacteroidales;f__;g__	78	0	0	0	0	0	0	0	0	4	76	0	0	0	0	0	0	0	0	0	0	0	0	0	0	20	45	0	16	0	0	0	0	0	23	0	0	0	28	9	0	0	0	20	0	0	0	0	15
k__Bacteria;p__Bacteroidetes;c__Bacteroidia;o__Bacteroidales;f__Bacteroidaceae;g__Bacteroides	159	776	1070	1324	617	819	708	206	348	362	156	681	333	742	1262	371	1440	908	150	633	1128	384	588	755	1013	586	396	688	277	960	943	247	1163	981	471	137	235	1187	483	354	188	594	756	571	433	112	1104	643	649
k__Bacteria;p__Bacteroidetes;c__Bacteroidia;o__Bacteroidales;f__Porphyromonadaceae;g__Parabacteroides	169	168	39	148	32	64	56	59	136	68	66	25	14	161	113	41	121	99	59	97	175	144	55	251	50	20	144	115	21	101	87	5	227	52	76	25	87	273	45	81	43	62	103	170	69	3	83	47	34
k__Bacteria;p__Bacteroidetes;c__Bacteroidia;o__Bacteroidales;f__Prevotellaceae;g__	0	0	0	0	0	0	0	0	0	0	0	0	0	0	0	0	0	0	0	0	0	0	0	0	0	0	0	0	0	0	0	0	0	0	0	0	0	0	0	0	0	0	0	0	0	0	0	0	0
k__Bacteria;p__Bacteroidetes;c__Bacteroidia;o__Bacteroidales;f__Prevotellaceae;g__Prevotella	1078	0	0	0	426	0	252	32	343	595	359	0	988	0	0	1156	0	0	896	133	15	786	366	0	1	36	426	0	1132	0	0	0	6	0	325	1431	361	0	16	507	461	239	0	111	929	0	0	326	57
k__Bacteria;p__Bacteroidetes;c__Bacteroidia;o__Bacteroidales;f__Rikenellaceae;__	0	1	0	0	0	3	0	0	0	0	1	0	0	2	0	0	0	2	0	0	3	0	0	0	0	0	0	2	0	0	1	0	0	0	0	0	0	0	0	0	0	0	0	6	0	0	0	0	1
k__Bacteria;p__Bacteroidetes;c__Bacteroidia;o__Bacteroidales;f__Rikenellaceae;g__	6	169	213	48	143	69	144	257	188	168	9	5	90	101	161	151	19	127	61	42	75	192	73	147	69	185	37	124	40	125	151	18	86	140	122	29	98	97	162	8	89	89	154	28	148	37	124	70	155
k__Bacteria;p__Bacteroidetes;c__Bacteroidia;o__Bacteroidales;f__Rikenellaceae;g__AF12	0	0	0	0	0	0	0	0	0	0	1	0	0	0	0	0	0	0	0	0	0	0	0	0	0	0	0	0	0	0	0	0	0	0	0	0	0	0	0	0	0	0	0	2	0	0	0	0	1
k__Bacteria;p__Bacteroidetes;c__Bacteroidia;o__Bacteroidales;f__S24-7;g__	122	0	0	0	236	123	3	0	236	89	32	2	64	225	0	0	0	0	110	0	0	0	118	0	0	0	55	0	16	0	0	0	0	94	77	41	0	0	0	119	174	1	0	9	0	0	0	79	3
k__Bacteria;p__Bacteroidetes;c__Bacteroidia;o__Bacteroidales;f__[Barnesiellaceae];g__	0	74	0	54	52	38	67	153	5	9	11	0	30	8	118	93	31	135	2	24	101	101	12	21	36	39	7	76	2	46	151	0	60	49	5	10	51	34	18	0	3	46	34	14	62	12	43	19	12
k__Bacteria;p__Bacteroidetes;c__Bacteroidia;o__Bacteroidales;f__[Odoribacteraceae];g__Butyricimonas	18	11	23	37	15	21	41	10	3	9	33	0	12	21	47	32	20	52	64	6	59	32	12	0	1	6	37	5	4	10	31	0	26	52	14	0	7	0	16	0	15	19	15	18	23	2	17	10	10
k__Bacteria;p__Bacteroidetes;c__Bacteroidia;o__Bacteroidales;f__[Odoribacteraceae];g__Odoribacter	7	66	48	10	15	11	28	25	7	44	13	7	18	14	35	28	15	21	4	18	17	34	6	25	16	14	12	14	8	7	13	2	9	12	15	2	14	9	32	0	3	10	15	11	16	5	15	7	7
k__Bacteria;p__Bacteroidetes;c__Bacteroidia;o__Bacteroidales;f__[Paraprevotellaceae];g__	8	0	0	0	8	0	10	0	82	6	0	0	14	0	0	19	0	0	0	2	0	7	9	0	0	9	4	0	4	0	0	0	0	0	9	13	0	0	17	3	0	0	0	0	11	0	0	7	10
k__Bacteria;p__Bacteroidetes;c__Bacteroidia;o__Bacteroidales;f__[Paraprevotellaceae];g__Paraprevotella	12	0	0	0	153	0	23	44	102	21	5	0	55	12	58	26	43	91	33	11	33	71	130	77	0	13	17	0	22	72	38	0	129	0	55	11	61	118	7	66	19	31	0	43	72	0	0	57	4
k__Bacteria;p__Bacteroidetes;c__Bacteroidia;o__Bacteroidales;f__[Paraprevotellaceae];g__[Prevotella]	113	0	0	0	0	0	0	0	0	0	3	0	0	190	0	0	0	0	96	0	0	0	0	0	0	0	35	0	0	0	0	0	0	0	0	0	0	0	0	38	21	0	0	3	0	0	0	0	0
k__Bacteria;p__Cyanobacteria;c__4C0d-2;o__YS2;f__;g__	0	0	0	0	0	80	0	0	0	0	16	1	1	0	0	0	0	0	0	0	0	16	0	184	0	3	14	0	0	0	0	0	0	26	0	0	0	0	4	0	0	0	0	4	6	0	0	0	1
k__Bacteria;p__Elusimicrobia;c__Elusimicrobia;o__Elusimicrobiales;f__Elusimicrobiaceae;g__	0	0	0	0	0	0	0	0	0	0	131	0	0	0	0	0	0	0	0	0	0	0	0	0	0	0	158	0	0	0	0	0	0	0	0	0	0	0	0	0	0	0	0	6	0	0	0	0	0
k__Bacteria;p__Firmicutes;c__Bacilli;o__Gemellales;f__Gemellaceae;g__	0	0	0	0	0	0	0	0	0	0	0	0	0	0	0	0	0	0	0	0	0	0	0	0	0	0	0	0	0	0	0	0	0	0	0	0	0	0	0	0	0	0	0	0	0	0	0	0	0
k__Bacteria;p__Firmicutes;c__Bacilli;o__Lactobacillales;f__Carnobacteriaceae;g__Granulicatella	0	0	4	0	0	0	0	0	0	0	0	0	0	0	0	0	0	0	0	0	0	0	0	0	0	0	0	0	0	0	0	0	0	0	0	0	0	0	0	0	0	0	0	0	0	0	0	0	0
k__Bacteria;p__Firmicutes;c__Bacilli;o__Lactobacillales;f__Enterococcaceae;g__Enterococcus	0	0	0	0	9	0	0	0	0	0	0	0	0	0	0	0	0	0	0	0	0	0	0	0	0	0	0	0	0	0	0	0	0	0	0	0	0	0	0	0	0	0	0	0	0	0	0	0	0
k__Bacteria;p__Firmicutes;c__Bacilli;o__Lactobacillales;f__Lactobacillaceae;g__Lactobacillus	0	0	1	0	0	0	0	0	0	68	0	0	0	0	0	0	0	0	0	0	0	0	0	0	0	0	0	0	2	0	0	0	2	0	6	0	0	0	0	0	0	0	0	0	0	0	0	0	0
k__Bacteria;p__Firmicutes;c__Bacilli;o__Lactobacillales;f__Streptococcaceae;g__Lactococcus	0	0	0	0	0	0	0	0	0	0	0	0	0	0	0	0	0	0	0	0	0	0	0	0	0	0	0	0	0	0	0	0	0	0	3	0	0	0	0	0	0	0	0	0	0	0	0	0	0
k__Bacteria;p__Firmicutes;c__Bacilli;o__Lactobacillales;f__Streptococcaceae;g__Streptococcus	0	0	55	6	0	9	0	3	0	12	4	2	3	14	39	0	5	70	3	0	2	1	0	1	7	4	0	29	4	14	0	3	9	0	14	0	0	0	9	16	0	0	9	0	0	5	4	0	1
k__Bacteria;p__Firmicutes;c__Bacilli;o__Turicibacterales;f__Turicibacteraceae;g__Turicibacter	0	0	0	0	0	0	0	0	3	1	6	0	15	5	0	0	0	0	0	0	0	0	0	1	0	0	0	0	0	0	0	0	0	0	0	16	0	0	0	0	0	0	0	0	3	0	0	0	0
k__Bacteria;p__Firmicutes;c__Clostridia;o__Clostridiales;__;__	11	0	22	0	13	7	10	2	4	8	24	0	30	14	2	2	0	0	5	0	0	0	5	4	18	241	157	0	3	0	7	0	0	8	0	0	1	0	100	8	8	4	2	72	2	0	3	3	68
k__Bacteria;p__Firmicutes;c__Clostridia;o__Clostridiales;f__;g__	62	0	10	39	57	47	9	12	28	105	93	0	85	20	12	52	37	42	56	20	86	15	99	50	47	220	60	1	32	22	17	3	28	129	65	11	0	56	376	20	109	57	41	75	49	4	15	72	192
k__Bacteria;p__Firmicutes;c__Clostridia;o__Clostridiales;f__Christensenellaceae;__	0	0	0	0	0	0	0	0	0	0	17	0	0	0	0	0	0	0	0	0	0	0	0	0	0	0	12	0	0	0	0	0	0	0	0	0	0	0	0	0	0	0	0	0	0	0	0	0	0
k__Bacteria;p__Firmicutes;c__Clostridia;o__Clostridiales;f__Christensenellaceae;g__	4	0	0	0	1	0	18	0	1	12	4	0	7	1	0	3	0	0	14	0	0	0	0	0	2	169	9	0	13	1	5	0	0	0	24	0	0	2	204	0	70	34	10	7	0	0	20	0	91
k__Bacteria;p__Firmicutes;c__Clostridia;o__Clostridiales;f__Christensenellaceae;g__Christensenella	16	0	0	0	0	0	0	0	0	0	0	0	0	0	0	0	0	0	0	0	0	0	0	0	0	0	0	0	0	0	0	0	0	0	0	0	0	0	0	0	0	0	0	0	0	0	0	0	0
k__Bacteria;p__Firmicutes;c__Clostridia;o__Clostridiales;f__Clostridiaceae;__	0	0	0	0	0	0	0	0	0	0	0	0	0	0	0	0	0	0	0	0	0	0	0	0	0	2	2	0	0	0	0	0	0	0	0	0	0	0	4	0	0	0	0	0	0	0	0	0	4
k__Bacteria;p__Firmicutes;c__Clostridia;o__Clostridiales;f__Clostridiaceae;g__	6	0	14	0	13	0	0	0	15	1	8	20	17	10	0	30	0	0	0	1	0	4	5	0	63	0	0	0	0	0	4	1	0	0	0	84	0	0	0	0	1	2	0	15	30	2	0	6	44
k__Bacteria;p__Firmicutes;c__Clostridia;o__Clostridiales;f__Clostridiaceae;g__Clostridium	0	1	4	0	23	3	2	2	1	0	9	0	5	4	6	0	0	11	3	0	16	0	10	5	7	6	0	0	0	8	9	4	7	13	0	1	3	1	14	0	2	0	1	0	0	33	18	6	2
k__Bacteria;p__Firmicutes;c__Clostridia;o__Clostridiales;f__Clostridiaceae;g__SMB53	0	0	0	0	0	0	0	0	0	0	0	0	12	0	0	0	0	0	0	7	0	0	0	0	0	0	0	0	0	0	0	0	0	0	0	0	0	0	0	0	0	0	0	0	0	0	0	0	0
k__Bacteria;p__Firmicutes;c__Clostridia;o__Clostridiales;f__Dehalobacteriaceae;g__Dehalobacterium	0	0	0	0	0	0	0	0	0	0	0	0	0	0	0	0	0	0	0	0	0	0	0	0	0	0	0	0	0	0	0	0	0	0	0	0	0	0	5	0	0	3	0	0	0	0	0	0	0
k__Bacteria;p__Firmicutes;c__Clostridia;o__Clostridiales;f__Lachnospiraceae;__	10	0	54	44	27	74	16	23	0	20	22	0	33	47	10	13	27	15	5	2	14	1	39	2	25	16	18	0	2	29	12	3	1	25	6	0	1	0	12	11	9	23	5	12	3	3	19	33	23
k__Bacteria;p__Firmicutes;c__Clostridia;o__Clostridiales;f__Lachnospiraceae;g__	147	212	82	142	76	194	178	140	82	88	151	256	86	143	112	153	99	171	135	129	66	144	266	213	280	13	199	213	145	244	201	191	75	297	96	39	103	129	7	339	109	141	111	134	305	134	170	205	7
k__Bacteria;p__Firmicutes;c__Clostridia;o__Clostridiales;f__Lachnospiraceae;g__Anaerostipes	0	6	6	0	2	0	2	10	6	7	0	0	4	4	1	6	14	1	1	0	7	0	0	0	6	10	0	0	4	3	2	0	4	0	0	1	0	0	1	0	3	0	4	6	0	4	0	6	0
k__Bacteria;p__Firmicutes;c__Clostridia;o__Clostridiales;f__Lachnospiraceae;g__Blautia	61	136	64	93	23	96	46	55	0	41	14	320	43	53	21	22	233	37	9	64	15	15	37	20	73	65	10	110	28	74	34	86	124	20	7	16	4	40	38	35	25	60	17	30	5	95	44	58	35
k__Bacteria;p__Firmicutes;c__Clostridia;o__Clostridiales;f__Lachnospiraceae;g__Clostridium	0	2	0	5	0	0	0	0	0	0	0	3	0	0	2	0	0	2	0	0	0	0	3	0	0	0	0	0	0	0	0	2	0	0	0	0	0	2	0	2	0	0	0	0	0	0	0	0	0
k__Bacteria;p__Firmicutes;c__Clostridia;o__Clostridiales;f__Lachnospiraceae;g__Coprococcus	95	56	67	38	60	29	55	45	12	104	39	128	94	54	90	37	86	164	104	30	51	129	37	162	71	76	20	15	253	148	39	12	66	10	62	7	105	63	53	41	73	49	63	45	93	7	71	55	18
k__Bacteria;p__Firmicutes;c__Clostridia;o__Clostridiales;f__Lachnospiraceae;g__Dorea	7	20	16	18	2	5	18	12	47	10	11	147	10	3	7	5	14	0	5	63	4	0	4	0	18	8	2	26	3	9	6	63	7	0	4	11	18	0	3	5	4	11	0	11	2	120	0	14	3
k__Bacteria;p__Firmicutes;c__Clostridia;o__Clostridiales;f__Lachnospiraceae;g__Epulopiscium	0	0	0	0	0	0	0	0	0	0	0	0	0	0	0	0	0	0	0	0	0	0	0	0	0	0	0	0	0	0	0	0	0	0	0	0	0	0	0	0	0	0	0	1	0	0	0	0	0
k__Bacteria;p__Firmicutes;c__Clostridia;o__Clostridiales;f__Lachnospiraceae;g__Lachnobacterium	0	0	0	0	0	0	0	0	5	9	0	0	7	78	13	0	0	1	0	0	0	16	0	17	0	0	0	0	0	0	0	0	0	0	13	0	1	11	0	0	1	0	0	0	0	268	0	0	0
k__Bacteria;p__Firmicutes;c__Clostridia;o__Clostridiales;f__Lachnospiraceae;g__Lachnospira	16	0	36	22	93	70	27	0	203	46	18	33	149	94	82	51	0	133	144	40	11	108	397	203	78	93	51	6	229	88	194	28	38	131	105	115	0	108	219	3	156	58	85	56	134	0	122	191	51
k__Bacteria;p__Firmicutes;c__Clostridia;o__Clostridiales;f__Lachnospiraceae;g__Pseudobutyrivibrio	0	0	0	0	0	0	0	0	0	0	0	0	0	0	0	0	0	0	0	0	0	0	0	0	0	0	0	0	0	0	0	0	0	0	0	0	0	0	0	5	0	0	0	0	0	0	0	0	0
k__Bacteria;p__Firmicutes;c__Clostridia;o__Clostridiales;f__Lachnospiraceae;g__Roseburia	105	394	74	376	81	198	188	105	89	57	41	177	32	175	80	76	88	53	34	107	0	68	85	144	269	0	11	46	33	92	219	484	17	81	19	140	80	22	0	76	40	73	8	5	48	443	31	228	0
k__Bacteria;p__Firmicutes;c__Clostridia;o__Clostridiales;f__Lachnospiraceae;g__[Ruminococcus]	31	39	18	22	22	17	15	37	9	21	12	203	21	26	10	16	97	32	7	77	24	11	6	0	10	39	9	101	3	24	12	77	72	13	6	7	0	16	20	19	4	40	4	22	4	42	6	18	17
k__Bacteria;p__Firmicutes;c__Clostridia;o__Clostridiales;f__Peptococcaceae;g__	0	0	0	0	0	0	3	0	2	0	0	0	0	5	0	0	0	0	0	3	0	7	0	2	5	0	2	0	0	0	0	0	0	0	0	0	0	1	0	0	5	5	0	11	1	0	0	0	0
k__Bacteria;p__Firmicutes;c__Clostridia;o__Clostridiales;f__Peptococcaceae;g__Peptococcus	0	0	0	0	0	0	0	0	0	0	0	0	0	0	0	0	0	0	0	0	0	0	0	0	0	5	0	0	0	0	0	0	0	0	0	0	0	0	4	0	0	0	0	0	0	0	0	0	2
k__Bacteria;p__Firmicutes;c__Clostridia;o__Clostridiales;f__Peptococcaceae;g__rc4-4	0	0	0	0	0	0	0	0	0	0	0	0	0	0	0	0	0	0	0	0	0	0	0	0	0	0	0	0	0	0	0	0	0	0	0	0	0	0	0	0	0	0	0	0	0	0	0	0	0
k__Bacteria;p__Firmicutes;c__Clostridia;o__Clostridiales;f__Peptostreptococcaceae;g__	5	0	72	0	10	0	0	4	26	11	16	12	40	23	1	0	4	5	2	15	0	0	2	3	14	0	17	0	0	0	1	20	1	0	0	36	0	0	0	3	0	0	0	5	7	0	0	7	0
k__Bacteria;p__Firmicutes;c__Clostridia;o__Clostridiales;f__Ruminococcaceae;__	29	0	59	0	26	0	30	64	86	40	21	0	31	92	30	14	0	40	24	7	0	7	20	8	18	15	31	0	41	64	48	1	2	0	30	33	84	30	6	55	45	8	2	32	6	1	2	32	12
k__Bacteria;p__Firmicutes;c__Clostridia;o__Clostridiales;f__Ruminococcaceae;g__	45	199	212	74	124	33	243	385	277	158	215	21	127	78	75	184	29	199	134	48	49	136	117	208	162	311	201	41	106	43	96	32	16	118	452	76	319	120	186	102	325	204	223	277	145	831	232	147	286
k__Bacteria;p__Firmicutes;c__Clostridia;o__Clostridiales;f__Ruminococcaceae;g__Anaerofilum	0	0	0	0	0	0	0	0	0	0	0	0	0	0	0	0	0	0	0	0	0	0	0	0	0	0	0	0	0	0	0	0	0	0	0	0	0	0	0	0	0	0	0	0	0	0	0	0	0
k__Bacteria;p__Firmicutes;c__Clostridia;o__Clostridiales;f__Ruminococcaceae;g__Anaerotruncus	5	0	0	0	0	0	0	0	0	0	0	2	0	0	0	0	0	0	0	0	11	0	0	0	0	0	0	4	0	0	0	4	4	0	0	0	0	0	0	0	0	0	5	0	0	0	0	0	0
k__Bacteria;p__Firmicutes;c__Clostridia;o__Clostridiales;f__Ruminococcaceae;g__Faecalibacterium	138	67	147	244	185	167	167	250	57	199	128	373	197	269	107	140	241	217	45	110	63	35	185	128	227	56	75	1	279	431	302	92	169	64	124	314	122	94	13	19	111	175	111	150	43	0	332	314	21
k__Bacteria;p__Firmicutes;c__Clostridia;o__Clostridiales;f__Ruminococcaceae;g__Oscillospira	65	28	134	64	68	35	211	40	127	56	78	29	62	58	110	85	43	57	136	62	181	100	108	78	65	113	119	66	77	120	65	38	277	133	336	52	64	59	88	92	68	287	265	169	187	29	186	89	202
k__Bacteria;p__Firmicutes;c__Clostridia;o__Clostridiales;f__Ruminococcaceae;g__Ruminococcus	21	105	41	73	183	120	118	48	20	114	87	6	113	131	69	52	3	85	20	3	47	44	59	57	146	114	81	24	40	148	128	3	58	132	44	15	0	167	119	33	24	158	168	73	13	244	130	145	100
k__Bacteria;p__Firmicutes;c__Clostridia;o__Clostridiales;f__Veillonellaceae;g__Acidaminococcus	0	0	0	0	10	0	46	315	0	61	0	0	0	0	0	0	0	0	8	0	0	0	0	0	0	0	0	0	0	0	0	0	0	0	0	0	187	0	0	0	14	6	0	0	0	0	0	4	0
k__Bacteria;p__Firmicutes;c__Clostridia;o__Clostridiales;f__Veillonellaceae;g__Dialister	0	85	0	45	4	0	4	165	6	41	3	353	0	33	124	4	0	10	472	4	4	0	4	186	0	0	1	358	17	55	0	26	2	0	53	2	455	245	0	12	522	2	264	0	0	0	149	0	5
k__Bacteria;p__Firmicutes;c__Clostridia;o__Clostridiales;f__Veillonellaceae;g__Megamonas	117	0	0	0	71	0	0	241	0	0	0	0	0	0	0	0	0	0	0	385	0	0	48	0	0	0	0	0	0	0	0	1074	0	0	0	0	534	0	0	151	0	0	0	0	0	0	0	100	0
k__Bacteria;p__Firmicutes;c__Clostridia;o__Clostridiales;f__Veillonellaceae;g__Megasphaera	0	138	0	0	0	0	0	51	173	0	0	0	0	0	0	0	0	0	0	0	0	0	0	0	0	0	0	601	0	0	0	0	0	0	0	97	40	0	0	0	0	0	0	0	0	638	0	0	0
k__Bacteria;p__Firmicutes;c__Clostridia;o__Clostridiales;f__Veillonellaceae;g__Mitsuokella	0	0	0	0	0	0	0	0	13	0	0	0	0	0	0	0	0	0	0	0	0	0	0	0	0	0	0	0	0	0	0	0	0	0	0	60	0	0	0	0	0	0	0	0	0	0	0	0	0
k__Bacteria;p__Firmicutes;c__Clostridia;o__Clostridiales;f__Veillonellaceae;g__Phascolarctobacterium	49	0	157	0	94	87	75	0	307	115	61	0	84	36	29	132	140	194	124	34	226	204	111	0	76	23	129	0	132	0	193	0	120	138	210	182	0	0	9	655	41	160	0	251	185	0	0	58	11
k__Bacteria;p__Firmicutes;c__Clostridia;o__Clostridiales;f__Veillonellaceae;g__Succiniclasticum	0	0	0	0	0	0	0	0	0	0	0	0	0	0	0	0	0	0	0	0	0	0	0	0	0	0	0	0	0	0	0	0	0	0	0	0	0	0	0	0	0	0	0	0	0	0	0	0	0
k__Bacteria;p__Firmicutes;c__Clostridia;o__Clostridiales;f__Veillonellaceae;g__Veillonella	0	0	0	0	0	0	0	0	0	0	0	0	1	5	38	0	0	41	0	0	4	0	0	0	0	0	0	4	0	0	0	0	0	0	0	9	0	0	0	0	0	0	0	0	0	0	0	0	0
k__Bacteria;p__Firmicutes;c__Clostridia;o__Clostridiales;f__[Mogibacteriaceae];g__	8	4	5	5	4	3	8	2	0	9	0	0	6	3	0	0	0	4	3	0	7	0	4	0	3	1	5	3	1	2	6	0	7	9	5	0	0	0	0	7	13	1	3	3	0	8	0	1	2
k__Bacteria;p__Firmicutes;c__Clostridia;o__Clostridiales;f__[Tissierellaceae];g__1-68	0	0	0	0	0	0	0	0	0	0	0	0	0	0	0	0	0	0	0	0	0	0	0	0	0	0	0	0	0	0	0	0	0	0	0	0	0	0	0	0	0	0	0	0	0	0	0	0	0
k__Bacteria;p__Firmicutes;c__Clostridia;o__Clostridiales;f__[Tissierellaceae];g__Peptoniphilus	0	0	0	0	0	0	0	0	0	0	0	0	0	0	0	0	0	0	0	0	2	0	0	0	0	0	0	0	0	0	0	0	5	0	0	0	0	0	0	0	0	0	0	0	0	0	0	0	0
k__Bacteria;p__Firmicutes;c__Clostridia;o__Clostridiales;f__[Tissierellaceae];g__WAL_1855D	0	0	0	0	0	0	0	0	0	0	0	0	0	0	0	0	0	0	0	0	0	0	0	0	0	0	0	0	0	0	0	0	0	0	0	0	0	0	0	0	1	0	0	0	0	0	0	0	3
k__Bacteria;p__Firmicutes;c__Clostridia;o__SHA-98;f__;g__	0	0	0	0	0	0	1	0	0	0	1	0	0	0	0	0	0	0	0	0	0	0	0	0	0	2	2	0	0	0	0	0	0	2	0	0	0	0	7	0	2	0	0	6	0	0	0	0	0
k__Bacteria;p__Firmicutes;c__Erysipelotrichi;o__Erysipelotrichales;f__Erysipelotrichaceae;__	0	0	0	0	0	0	0	0	0	2	0	0	0	0	0	0	0	0	0	0	0	0	0	0	0	0	0	0	1	0	0	0	0	0	0	0	0	0	0	0	0	0	0	0	0	0	0	0	0
k__Bacteria;p__Firmicutes;c__Erysipelotrichi;o__Erysipelotrichales;f__Erysipelotrichaceae;g__	0	27	19	11	4	55	12	13	0	0	2	129	42	13	0	0	70	0	4	27	57	0	3	17	37	35	10	28	0	30	4	8	13	50	0	0	0	6	39	0	9	16	17	8	0	17	6	35	25
k__Bacteria;p__Firmicutes;c__Erysipelotrichi;o__Erysipelotrichales;f__Erysipelotrichaceae;g__Bulleidia	0	0	0	0	0	0	0	0	0	0	0	0	0	0	0	0	0	0	0	0	0	0	0	0	0	0	0	0	0	0	0	0	0	0	0	0	0	0	0	0	0	0	0	0	0	0	0	0	0
k__Bacteria;p__Firmicutes;c__Erysipelotrichi;o__Erysipelotrichales;f__Erysipelotrichaceae;g__Catenibacterium	83	0	0	0	0	0	0	0	21	67	22	0	0	0	0	22	0	0	0	0	0	6	0	0	0	0	6	0	70	0	0	0	0	0	93	19	0	0	0	62	0	0	0	14	6	0	0	0	0
k__Bacteria;p__Firmicutes;c__Erysipelotrichi;o__Erysipelotrichales;f__Erysipelotrichaceae;g__Coprobacillus	0	0	0	0	2	0	0	0	0	0	0	0	0	0	0	0	0	0	0	0	0	0	0	0	0	12	0	0	0	0	0	0	1	0	0	0	0	0	0	0	0	0	0	0	0	0	0	0	0
k__Bacteria;p__Firmicutes;c__Erysipelotrichi;o__Erysipelotrichales;f__Erysipelotrichaceae;g__Holdemania	0	0	3	0	0	0	0	0	0	0	2	2	0	0	0	0	2	0	0	7	5	0	0	0	0	0	0	0	0	0	3	0	5	6	0	0	0	1	0	0	0	2	0	0	0	0	0	0	1
k__Bacteria;p__Firmicutes;c__Erysipelotrichi;o__Erysipelotrichales;f__Erysipelotrichaceae;g__[Eubacterium]	0	0	42	0	0	48	64	77	3	0	39	28	0	2	0	40	0	0	0	12	1	9	0	10	39	4	62	0	0	0	0	6	2	101	0	7	1	5	2	0	0	18	1	42	9	0	0	0	0
k__Bacteria;p__Firmicutes;c__Erysipelotrichi;o__Erysipelotrichales;f__Erysipelotrichaceae;g__cc_115	0	0	0	0	0	0	0	4	0	3	0	0	2	0	0	0	0	0	0	0	0	0	0	0	0	0	0	0	0	1	0	0	0	0	2	0	0	0	0	0	0	0	0	0	0	0	0	0	0
k__Bacteria;p__Fusobacteria;c__Fusobacteriia;o__Fusobacteriales;f__Fusobacteriaceae;g__Fusobacterium	0	16	0	0	0	0	0	0	0	0	0	66	0	0	0	0	0	0	0	716	0	0	0	0	0	0	0	4	0	0	0	164	0	0	0	0	0	0	0	0	0	0	1	0	0	0	0	0	0
k__Bacteria;p__Lentisphaerae;c__[Lentisphaeria];o__Victivallales;f__Victivallaceae;__	0	0	5	0	0	0	0	0	0	0	6	0	0	0	0	0	0	0	3	0	0	0	0	0	0	0	0	0	1	0	0	0	0	0	0	0	0	0	0	0	0	0	0	0	0	0	0	0	0
k__Bacteria;p__Lentisphaerae;c__[Lentisphaeria];o__Victivallales;f__Victivallaceae;g__	1	0	1	0	0	19	0	0	0	2	10	0	0	0	0	1	0	0	0	0	0	0	0	0	3	10	18	0	0	0	0	0	0	0	2	0	0	0	4	0	0	0	0	6	2	0	0	0	8
k__Bacteria;p__Proteobacteria;c__Alphaproteobacteria;__;__;__	0	0	0	0	0	0	0	0	0	0	55	0	0	0	0	0	0	0	0	0	0	0	0	0	0	0	1	0	0	0	0	0	0	0	0	0	0	0	0	0	0	0	0	6	0	0	0	0	0
k__Bacteria;p__Proteobacteria;c__Alphaproteobacteria;o__RF32;f__;g__	2	16	0	0	8	467	0	0	0	7	231	1	21	15	0	1	0	0	0	5	349	31	13	20	54	21	64	3	0	0	0	0	11	107	0	0	1	0	1	0	0	10	0	101	1	0	0	0	53
k__Bacteria;p__Proteobacteria;c__Betaproteobacteria;o__Burkholderiales;f__Alcaligenaceae;g__Sutterella	194	263	291	80	61	131	9	68	21	119	51	86	70	54	216	40	120	120	82	58	152	150	42	151	113	15	83	297	84	71	74	0	142	95	39	79	93	68	20	140	5	12	16	42	50	44	41	62	11
k__Bacteria;p__Proteobacteria;c__Betaproteobacteria;o__Burkholderiales;f__Oxalobacteraceae;g__Oxalobacter	0	0	0	0	1	0	0	0	0	2	0	0	0	0	0	0	0	0	0	0	0	0	2	0	0	0	0	0	2	0	0	0	0	0	0	0	1	0	0	0	0	0	0	0	0	0	0	0	0
k__Bacteria;p__Proteobacteria;c__Deltaproteobacteria;o__Desulfovibrionales;f__Desulfovibrionaceae;g__	2	0	23	5	0	4	0	1	3	1	5	0	1	0	0	6	6	0	0	4	23	13	0	0	2	2	5	0	1	0	0	0	17	18	3	0	0	0	5	2	0	0	4	11	16	0	3	0	1
k__Bacteria;p__Proteobacteria;c__Deltaproteobacteria;o__Desulfovibrionales;f__Desulfovibrionaceae;g__Bilophila	0	50	31	13	8	12	0	24	0	19	1	31	1	18	34	0	19	23	26	73	21	3	10	15	3	2	4	38	8	21	12	23	40	23	11	0	30	24	6	13	1	8	7	8	0	0	0	4	7
k__Bacteria;p__Proteobacteria;c__Deltaproteobacteria;o__Desulfovibrionales;f__Desulfovibrionaceae;g__Desulfovibrio	8	0	0	0	70	0	0	0	65	0	25	0	10	0	0	25	0	0	0	9	0	102	24	0	0	8	40	0	0	0	0	0	0	0	4	22	0	0	18	49	0	0	0	75	53	0	0	8	38
k__Bacteria;p__Proteobacteria;c__Epsilonproteobacteria;o__Campylobacterales;f__Campylobacteraceae;g__Campylobacter	0	0	0	0	0	0	0	0	0	0	0	0	0	0	0	0	0	0	0	0	0	0	0	0	0	0	0	0	0	0	0	0	0	0	0	0	0	0	0	0	0	0	0	0	0	0	0	0	0
k__Bacteria;p__Proteobacteria;c__Gammaproteobacteria;o__Aeromonadales;f__Aeromonadaceae;g__	0	0	0	0	0	0	0	0	0	0	0	0	0	0	0	0	0	0	0	0	0	0	0	0	0	0	0	0	0	0	0	0	0	0	0	0	0	0	0	0	0	0	0	0	0	0	0	0	0
k__Bacteria;p__Proteobacteria;c__Gammaproteobacteria;o__Aeromonadales;f__Succinivibrionaceae;g__Succinivibrio	0	0	0	0	0	0	0	0	0	0	705	0	0	5	0	0	0	0	0	0	0	0	0	0	0	0	223	0	0	0	0	0	0	0	0	0	0	0	0	0	0	0	0	260	0	0	0	0	0
k__Bacteria;p__Proteobacteria;c__Gammaproteobacteria;o__Enterobacteriales;f__Enterobacteriaceae;__	41	0	0	0	0	1	0	0	0	0	0	7	0	0	0	0	0	0	0	0	0	0	38	0	0	0	0	0	0	0	0	0	0	0	0	0	0	0	0	3	0	0	0	0	0	0	0	0	0
k__Bacteria;p__Proteobacteria;c__Gammaproteobacteria;o__Enterobacteriales;f__Enterobacteriaceae;g__Citrobacter	0	0	0	0	0	0	0	0	0	0	0	0	0	0	0	0	0	0	0	0	0	1	5	0	0	0	0	0	0	0	0	0	0	0	0	0	0	0	0	0	0	0	0	0	0	0	0	0	0
k__Bacteria;p__Proteobacteria;c__Gammaproteobacteria;o__Enterobacteriales;f__Enterobacteriaceae;g__Escherichia	0	0	0	54	7	0	0	0	2	7	0	0	0	0	0	0	0	0	2	0	12	3	0	0	0	14	3	52	0	0	2	0	41	0	0	1	9	28	59	2	0	8	0	5	0	0	0	0	0
k__Bacteria;p__Proteobacteria;c__Gammaproteobacteria;o__Enterobacteriales;f__Enterobacteriaceae;g__Klebsiella	0	0	0	0	0	0	0	0	0	0	0	0	0	0	0	0	0	0	0	0	0	0	0	0	0	0	0	0	0	0	0	428	0	0	0	0	1	0	0	0	0	0	0	0	0	4	0	0	0
k__Bacteria;p__Proteobacteria;c__Gammaproteobacteria;o__Enterobacteriales;f__Enterobacteriaceae;g__Serratia	0	0	0	0	0	0	0	0	0	0	0	0	0	0	0	0	0	0	0	0	0	0	14	0	0	0	0	0	0	0	0	0	0	0	0	0	0	0	0	0	0	0	0	0	0	0	0	0	0
k__Bacteria;p__Proteobacteria;c__Gammaproteobacteria;o__Pasteurellales;f__Pasteurellaceae;__	0	0	0	0	0	0	0	0	0	0	0	0	0	0	0	0	0	0	0	0	0	0	0	0	0	0	0	0	0	0	0	0	0	0	0	0	0	0	0	0	0	0	0	0	0	0	0	0	0
k__Bacteria;p__Proteobacteria;c__Gammaproteobacteria;o__Pasteurellales;f__Pasteurellaceae;g__Haemophilus	0	0	0	0	13	0	0	0	3	11	0	0	3	37	54	0	0	9	0	0	0	0	0	0	0	0	0	0	12	0	0	0	0	0	0	10	0	0	0	0	0	0	0	0	0	0	0	0	0
k__Bacteria;p__Proteobacteria;c__Gammaproteobacteria;o__Pseudomonadales;f__Pseudomonadaceae;g__Pseudomonas	0	0	0	0	0	0	0	0	0	0	0	0	0	0	3	0	0	0	0	0	0	0	0	0	0	0	0	0	0	0	0	0	0	0	0	0	0	0	0	0	0	0	0	0	0	0	0	0	0
k__Bacteria;p__Synergistetes;c__Synergistia;o__Synergistales;f__Dethiosulfovibrionaceae;g__Pyramidobacter	0	0	0	0	0	0	0	2	0	0	0	0	0	0	0	0	0	0	0	0	0	0	0	0	0	0	0	0	0	0	0	0	0	0	0	0	1	0	0	0	0	0	0	0	0	0	0	0	0
k__Bacteria;p__Synergistetes;c__Synergistia;o__Synergistales;f__Synergistaceae;g__	0	0	0	0	0	0	0	0	0	0	0	0	0	0	0	0	0	0	0	0	0	0	0	0	0	10	0	0	0	0	0	0	0	0	0	0	0	0	16	0	0	0	0	0	0	0	0	0	0
k__Bacteria;p__Synergistetes;c__Synergistia;o__Synergistales;f__Synergistaceae;g__Synergistes	0	0	0	0	0	0	0	0	0	0	0	0	0	0	0	0	0	0	0	0	0	0	0	0	0	7	0	0	0	0	0	0	0	0	0	0	0	0	0	0	0	0	0	0	0	0	0	0	5
k__Bacteria;p__TM7;c__TM7-3;o__;f__;g__	0	5	0	0	0	0	0	0	0	0	0	0	0	0	0	0	2	0	0	0	0	0	0	0	0	0	0	0	0	0	1	0	0	0	0	0	0	0	0	0	3	0	0	0	0	0	0	0	0
k__Bacteria;p__Tenericutes;c__Mollicutes;o__Anaeroplasmatales;f__Anaeroplasmataceae;g__	0	0	0	0	0	0	0	0	2	0	0	0	0	0	0	0	0	0	0	0	0	0	0	0	0	0	0	0	0	0	0	0	0	0	0	0	0	0	0	0	0	0	0	0	0	0	0	0	0
k__Bacteria;p__Tenericutes;c__Mollicutes;o__RF39;f__;g__	0	0	0	0	0	0	0	0	0	0	0	0	8	0	0	0	0	0	0	0	0	0	0	0	0	2	0	0	0	11	0	0	0	0	0	0	0	0	2	0	2	0	0	2	0	0	0	0	3
k__Bacteria;p__Tenericutes;c__RF3;o__ML615J-28;f__;g__	0	0	0	0	0	3	10	0	0	7	7	0	0	3	0	6	0	0	0	0	0	0	0	0	0	36	2	0	0	0	0	0	0	0	0	0	0	0	12	0	0	0	3	2	0	0	2	0	15
k__Bacteria;p__Verrucomicrobia;c__Opitutae;o__[Cerasicoccales];f__[Cerasicoccaceae];g__	0	0	0	0	0	0	6	0	0	0	1	0	0	0	0	0	0	0	0	0	0	0	0	0	0	3	20	0	0	0	0	0	0	0	0	0	0	0	9	0	0	12	0	7	0	0	0	0	3
k__Bacteria;p__Verrucomicrobia;c__Verrucomicrobiae;o__Verrucomicrobiales;f__Verrucomicrobiaceae;g__Akkermansia	0	0	0	0	18	10	150	0	3	1	0	5	9	0	2	0	0	6	38	74	0	45	9	0	11	395	0	3	0	51	68	1	0	44	0	0	0	73	441	0	260	395	591	90	4	0	145	0	806
[truncated: 155 more columns]

## Sheet: Metadata
#SampleID	Time	Intervention	Product
3977247-100-1	1	1	1
3997760-100-3	3	1	1
4070341-100-4	4	2	2
4033449-100-5	5	2	2
4058972-100-6	6	2	2
3977246-101-1	1	1	1
3978608-101-2	2	1	1
3997721-101-3	3	1	1
4058760-101-6	6	2	2
3977245-102-1	1	1	1
4032168-102-6	6	2	2
3977244-103-1	1	1	1
4070882-104-4	4	2	2
4064971-104-5	5	2	2
3977242-106-1	1	1	1
3997972-106-3	3	1	1
4070879-106-4	4	2	2
4066183-106-5	5	2	2
4032177-106-6	6	2	2
39770005-107-1	1	1	1
3978640-107-2	2	1	1
4001757-107-3	3	1	1
4070930-107-4	4	2	2
4066513-107-5	5	2	2
4032180-107-6	6	2	2
3977003-108-1	1	1	2
3997765-108-3	3	1	2
4070734-108-4	4	2	1
3977004-109-1	1	1	1
3978826-109-2	2	1	1
3997938-109-3	3	1	1
4066203-109-5	5	2	2
4032181-109-6	6	2	2
3977007-110-1	1	1	1
3996849-110-2	2	1	1
3977008-111-1	1	1	2
3997941-111-3	3	1	2
4070876-111-4	4	2	1
4066506-111-5	5	2	1
4032169-111-6	6	2	1
3977009-112-1	1	1	2
3997939-112-3	3	1	2
4070880-112-4	4	2	1
4066514-112-5	5	2	1
4032204-112-6	6	2	1
3977010-113-1	1	1	1
3995611-113-2	2	1	1
3997974-113-3	3	1	1
3977011-114-1	1	1	2
3995609-114-2	2	1	2
4001770-114-3	3	1	2
4066517-114-5	5	2	1
4032203-114-6	6	2	1
3977012-115-1	1	1	2
3978797-115-2	2	1	2
4066518-115-5	5	2	1
4032202-115-6	6	2	1
3977013-116-1	1	1	2
3995379-116-2	2	1	2
3997542-116-3	3	1	2
4032082-116-6	6	2	1
3977014-117-1	1	1	2
3979607-117-2	2	1	2
3997726-117-3	3	1	2
4033460-117-5	5	2	1
4058975-117-6	6	2	1
3977015-118-1	1	1	2
3977016-119-1	1	1	1
4001948-119-3	3	1	1
4033461-119-5	5	2	2
4058974-119-6	6	2	2
3977006-120-1	1	1	2
4070384-120-4	4	2	1
4058955-120-6	6	2	1
3916990-121-1	1	1	2
3995615-121-2	2	1	2
3997988-121-3	3	1	2
4070935-121-4	4	2	1
4064974-121-5	5	2	1
4032174-121-6	6	2	1
3932644-122-1	1	1	2
4001676-122-3	3	1	2
4032214-122-6	6	2	1
3977241-125-1	1	1	1
3997927-125-3	3	1	1
4064980-125-5	5	2	2
4032205-125-6	6	2	2
3977002-126-1	1	1	1
3978643-126-2	2	1	1
3997986-126-3	3	1	1
4070929-126-4	4	2	2
4064975-126-5	5	2	2
4032237-126-6	6	2	2
3978599-071-2	2	1	2
3997718-071-3	3	1	2
4070877-071-4	4	2	1
4066511-071-5	5	2	1
3977001-072-1	1	1	2
3978641-072-2	2	1	2
3997971-072-3	3	1	2
4066217-072-5	5	2	1
4032175-072-6	6	2	1
3977274-073-1	1	1	1
3978602-073-2	2	1	1
4001667-073-3	3	1	1
4058753-073-6	6	2	2
3977273-074-1	1	1	1
3978593-074-2	2	1	1
3997605-074-3	3	1	1
4070390-074-4	4	2	2
4058855-074-6	6	2	2
3977272-075-1	1	1	2
3977275-075-1	1	1	2
3977271-076-1	1	1	1
3977270-077-1	1	1	2
3978598-077-2	2	1	2
3997716-077-3	3	1	2
3977269-078-1	1	1	1
3978824-078-2	2	1	1
4001665-078-3	3	1	1
4064973-078-5	5	2	2
3977268-079-1	1	1	2
3979852-079-2	2	1	2
3997758-079-3	3	1	2
4070340-079-4	4	2	1
4033459-079-5	5	2	1
4058973-079-6	6	2	1
3977267-080-1	1	1	1
3997759-080-3	3	1	1
4070339-080-4	4	2	2
3978596-081-2	2	1	1
3997979-081-3	3	1	1
4070343-081-4	4	2	2
4058970-081-6	6	2	2
3977265-082-1	1	1	2
3997761-082-3	3	1	2
4070344-082-4	4	2	1
4058346-082-5	5	2	1
3977264-083-1	1	1	1
4001465-083-3	3	1	1
3978607-084-2	2	1	1
3997773-084-3	3	1	1
4065000-084-5	5	2	2
4032206-084-6	6	2	2
3977262-085-1	1	1	1
3997727-085-3	3	1	1
4033457-085-5	5	2	2
4058740-085-6	6	2	2
3977261-086-1	1	1	2
3978603-086-2	2	1	2
4070385-086-4	4	2	2
4070881-086-4	4	2	1
4032171-086-6	6	2	1
3977260-087-1	1	1	2
4001664-087-3	3	1	2
4066220-087-5	5	2	1
4032170-087-6	6	2	1
3977259-088-1	1	1	2
3978633-088-2	2	1	1
3977258-089-1	1	1	1
3979808-089-2	2	1	1
4001771-089-3	3	1	1
4070934-089-4	4	2	2
4066497-089-5	5	2	2
4032176-089-6	6	2	2
3977257-90-1	1	1	2
3996048-090-2	2	1	2
3997717-90-3	3	1	2
4070338-090-4	4	2	1
3977256-091-1	1	1	1
3997973-091-3	3	1	1
3977255-92-1	1	1	2
3997720-92-3	3	1	2
4070342-92-4	4	2	1
4032173-92-6	6	2	1
3977254-93-1	1	1	2
3978591-93-2	2	1	2
3997762-93-3	3	1	2
4070345-93-4	4	2	1
4032172-93-6	6	2	1
4071430-94-4	4	2	1
4032213-94-6	6	2	1
3977252-95-1	1	1	1
3978590-95-2	2	1	1
3997940-95-3	3	1	1
4070878-95-4	4	2	2
4064976-95-5	5	2	2
4032186-95-6	6	2	2
3977251-96-1	1	1	2
3979809-96-2	2	1	2
3997719-96-3	3	1	2
4058853-96-6	6	2	1
3977250-97-1	1	1	1
3995614-97-2	2	1	1
3997944-97-3	3	1	1
4032179-97-6	6	2	2
3977249-98-1	1	1	1
3978620-98-2	2	1	1
3977248-099-1	1	1	1
3995613-99-2	2	1	1
3997943-99-3	3	1	1
4070928-99-4	4	2	2
4064998-99-5	5	2	2
4032178-99-6	6	2	2
